# Supplementary material for: Resource use and efficiency, and stomatal responses to environmental drivers of oak and pine species in an Atlantic Coastal Plain forest
Source: Front Plant Sci. 2015 May 7;6:297. doi: 10.3389/fpls.2015.00297 (PMC4423344; doi:10.3389/fpls.2015.00297)
Supplement: Supplementary file 2 [file Table2.DOCX]

**Table S2:** Means and standard error of gas exchange, leaf isotope and nutrient parameters across *Pinus* individuals (*P. rigida* and *P. echinata*) measured at the SL (oak-dominated stand), BTB and CB (pine-dominated stands) sites. Rows with different letters differ at  < 0.05.

| ***Pinus spp.*** | SL | BTB | CB |
| --- | --- | --- | --- |
| Maximum assimilation rate (mol m-2 s-1) | 15.3 (1.5)**a** | 15.5 (1.5)**a** | 18.4 (1.0)**a** |
| Quantum yield (mol mol-1) | 0.047 (0.007)**a** | 0.047 (0.004)**a** | 0.048 (0.004)**a** |
| Light compensation pt. (mol m-2 s-1) | 18.6 (1.8)**a** | 30.9 (6.4)**a** | 14.4 (2.6)**a** |
| Dark respiration rate (mol m-2 s-1) | 0.79 (0.15)**a** | 1.30 (0.27)**a** | 0.67 (0.13)a |
| VCmax,25 (mol m-2 s-1)1 | 84.3 (5.0)**a** | 82.0 (12.9)**a** | 82.9 (7.5)**a** |
| Jmax,25 (mol m-2 s-1)2 | 114.4 (9.1)**a** | 76.3 (12.4)**a** | 94.5 (11.6)**a** |
| TPU,25 (mol m-2 s-1)3 | 8.4 (0.4)**a** | 5.1 (0.7)**a** | 7.2 (1.0)**a** |
| Daytime respiration rate (mol m-2 s-1) | 6.7 (0.9)a | 3.0 (0.6)b | 3.6 (0.5)b |
| Transpiration (E; mmol m-2 s-1) | 3.70 (0.47)**a** | 5.32 (0.36)**b** | 5.08 (0.34)**b** |
| Stomatal cond. (gs; mol m-2 s-1) | 0.14 (0.02)**a** | 0.18 (0.02)**a** | 0.21 (0.01)**a** |
| ci/ca inst.4 | 0.55 (0.04)**a** | 0.65 (0.02)**b** | 0.65 (0.01)**b** |
| WUEinst. (A/E; mol mmol-1)5 | 4.34 (0.71)**a** | 2.87 (0.24)**b** | 3.55 (0.35)**ab** |
| iWUEinst. (A/gs; mol mol-1)6 | 105.0 (11.3)**a** | 85.1 (4.3)**a** | 87.1 (5.8)**a** |
| Ball-Berry parameter (m) | 3.7 (1.1)**a** | 5.1 (1.2)**a** | 7.5 (3.5)**a** |
| 13C (‰)7 | -30.0 (0.3)**a** | -30.8 (0.2)**b** | -30.1 (0.3)**a** |
|  (‰)8 | 19.6 (0.3)**a** | 21.4 (0.4)**b** | 19.8 (0.4)**a** |
| ci/ca iso.9 | 0.67 (0.01)**a** | 0.75 (0.02)**b** | 0.68 (0.02)**a** |
| iWUEiso. (mol mol-1)10 | 81.5 (3.0)**a** | 61.8 (4.6)**b** | 79.1 (4.3)**a** |
| Leaf mass per unit area (LMA; g m-2) | 229.2 (18.4)**a** | 241.7 (8.4)**a** | 251.2 (9.5)**a** |
| Leaf nitrogen concentration (N; %) | 1.16 (0.03)**a** | 1.01 (0.03)**b** | 0.92 (0.01)**b** |
| Leaf carbon concentration (C; %) | 47.8 (0.3)**a** | 49.5 (0.8)**a** | 47.2 (0.3)**a** |
| Leaf C/N ratio | 41.5 (1.1)**a** | 49.8 (1.3)**b** | 51.5 (0.8)**b** |
| Nitrogen per unit leaf area (Narea; g m-2) | 2.67 (0.25)**a** | 2.44 (0.09)**a** | 2.30 (0.09)**a** |
| PNUE (mol g-1 s-1)11 | 5.29 (0.68)**a** | 5.77 (0.74)**a** | 7.44 (0.40)**a** |

1Rubisco-limited carboxylation rate at 25 °C, 2Electron transport-limited carboxylation rate at 25 °C, 3Triose phosphate utilization-limited carboxylation rate at 25 °C, 4Instantaneous ratio of [CO2]inside leaf to [CO2]ambient air, 5Instantenous water-use efficiency, 6Instantenous intrinsic water–use efficiency, 7Leaf isotopic ratio, 8Leaf isotopic discrimination, 9Ratio of [CO2]inside leaf to [CO2]ambient air based on carbon isotope discrimination, 10Intrinsic water-use efficiency based on carbon isotope discrimination, 11Photosynthetic nitrogen-use efficiency
